# Supplementary material
Source: PubMed Central journal article supplement (PMC3791748)
Supplement: 1312775110_pnas.201312775SI.pdf [file 1312775110_pnas.201312775SI.pdf]

# Supporting Information

Li et al. 10.1073/pnas.1312775110

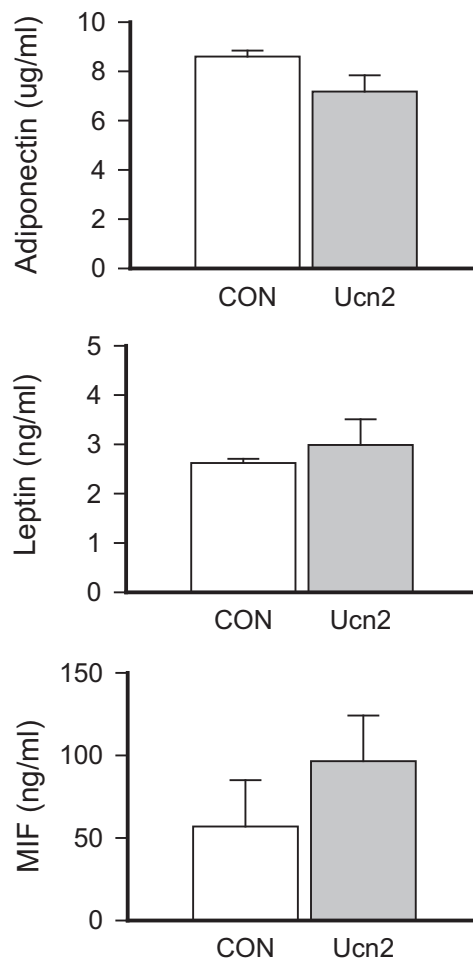

**Fig. S1.** Serum concentrations of adiponectin, leptin, and macrophage migration inhibitory factor measured at 20 min after treatment of mice with saline (CON) or urocortin 2 (Ucn2) (15  $\mu\text{g}/\text{kg}$  i.p.). *P* was nonsignificant for each.
